# Supplementary material
Source: Springer Nature journal article supplement (https://www.springermedizin.de/resource/supplementary/12998_2008_85_MOESM4_ESM.pdf/9623522)

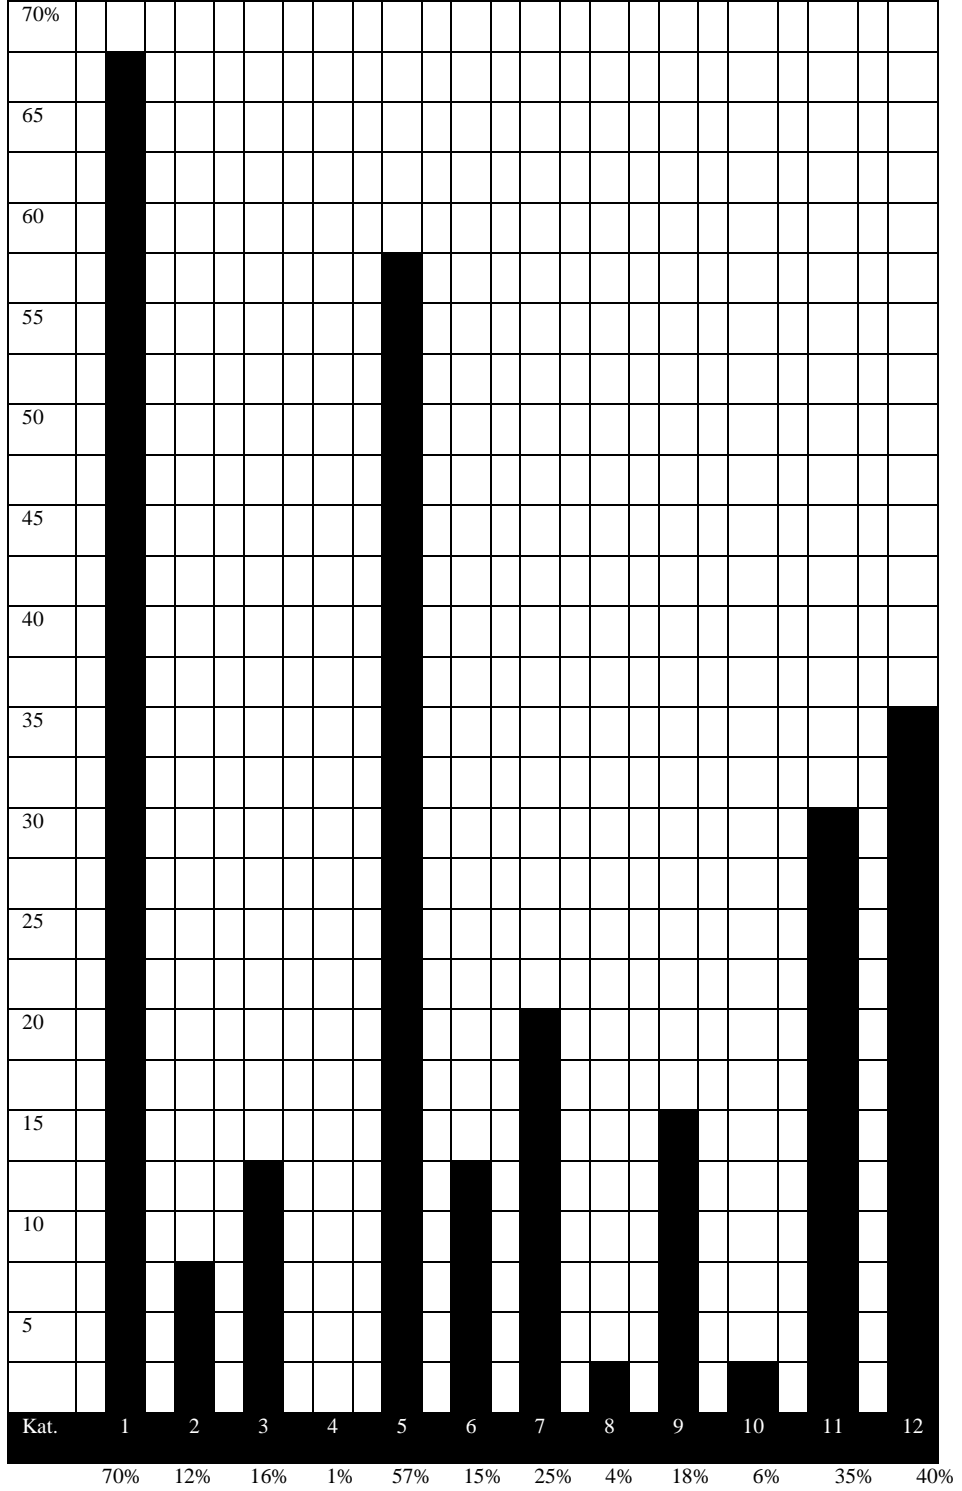

Supplement: MOESM4 [file 9623522]
